# Supplementary material for: Two monogenic disorders masquerading as one: severe congenital neutropenia with monocytosis and non-syndromic sensorineural hearing loss
Source: PubMed Central journal article supplement (PMC7026993; doi:10.1186/s12881-020-0971-z), 2020-02-17
Supplement: 12881_2020_971_MOESM1_ESM.pdf [file 12881_2020_971_MOESM1_ESM.pdf]

**Supplementary Tables:**

**Table S1: Neutrophil and monocyte counts of individuals where data was available.**

Readings outside the reference range (Ref) have been shown in bold.

| Parameter   |                 | Ref     | II-1         | III-2      | IV-1        | IV-2       | IV-3        | IV-4       | V-1        |
|-------------|-----------------|---------|--------------|------------|-------------|------------|-------------|------------|------------|
| Neutrophils | $\times 10^9/L$ | 2.0-7.5 | <b>0.957</b> | <b>0.8</b> | <b>0.76</b> | <b>0.5</b> | 2.45        | <b>1.1</b> | <b>0.7</b> |
| Monocytes   | $\times 10^9/L$ | 0-1.0   | <b>1.122</b> | <b>2.1</b> | <b>1.68</b> | <b>1.6</b> | <b>1.72</b> | <b>1.3</b> | <b>1.5</b> |

**Table S2: Genes known to be mutated in congenital neutropenia** (Skokowa *et al.* 2017).

| <b>Autosomal Dominant Inheritance</b>  |              |               |                |              |
|----------------------------------------|--------------|---------------|----------------|--------------|
| <i>ELANE</i>                           | <i>GF11</i>  | <i>GATA2</i>  | <i>TCIRG1</i>  | <i>CXCR4</i> |
| <i>CSF3R</i>                           |              |               |                |              |
| <b>Autosomal Recessive Inheritance</b> |              |               |                |              |
| <i>HAX1</i>                            | <i>JAGN1</i> | <i>G6PC3</i>  | <i>SLC37A4</i> | <i>SBDS</i>  |
| <i>STK4</i>                            | <i>CLPB</i>  | <i>AP3B1</i>  | <i>LAMTOR2</i> | <i>USB1</i>  |
| <i>VPS13B</i>                          | <i>VPS45</i> | <i>CXCR2</i>  | <i>EIFAK3</i>  | <i>LYST</i>  |
| <i>RAB27A</i>                          | <i>AK2</i>   | <i>RMRP</i>   | <i>TCN2</i>    | <i>CSF3R</i> |
| <b>X-linked Inheritance</b>            |              |               |                |              |
| <i>WAS</i>                             | <i>TAZ</i>   | <i>CD40LG</i> |                |              |

**Table S3: Genes known to be mutated in non-syndromic hearing loss (Shearer *et al.*, 2017).**

| <b>Autosomal Dominant Inheritance</b>  |                |                 |                 |                 |
|----------------------------------------|----------------|-----------------|-----------------|-----------------|
| <i>ACTG1</i>                           | <i>CCDC50</i>  | <i>CD164</i>    | <i>CEACAM16</i> | <i>COCH</i>     |
| <i>COL11A2</i>                         | <i>GSDME</i>   | <i>DIAPH1</i>   | <i>DMXL2</i>    | <i>DSPP</i>     |
| <i>EYA4</i>                            | <i>GJB2</i>    | <i>GJB3</i>     | <i>GJB6</i>     | <i>GRHL2</i>    |
| <i>HOMER2</i>                          | <i>KCNQ4</i>   | <i>MIR96</i>    | <i>MCM2</i>     | <i>MYH14</i>    |
| <i>MYH9</i>                            | <i>MYO1A</i>   | <i>MYO6</i>     | <i>MYO7A</i>    | <i>OSBPL2</i>   |
| <i>P2RX2</i>                           | <i>POU4F3</i>  | <i>SIX1</i>     | <i>SLC17A8</i>  | <i>TBC1D24</i>  |
| <i>TECTA</i>                           | <i>TJP2</i>    | <i>TMC1</i>     | <i>WFS1</i>     |                 |
| <b>Autosomal Recessive Inheritance</b> |                |                 |                 |                 |
| <i>ADCY1</i>                           | <i>BDP1</i>    | <i>BSND</i>     | <i>CABP2</i>    | <i>CDC14A</i>   |
| <i>CDH23 1</i>                         | <i>CIB2</i>    | <i>CLDN14</i>   | <i>CLIC5</i>    | <i>COL11A2</i>  |
| <i>DCDC2</i>                           | <i>PJK</i>     | <i>ELMOD3</i>   | <i>EPS8</i>     | <i>EPS8L2</i>   |
| <i>ESPN</i>                            | <i>ESRRB</i>   | <i>GIPC3 2</i>  | <i>GJB2 3</i>   | <i>GJB6 3</i>   |
| <i>GPSM2</i>                           | <i>GRXCR1</i>  | <i>GRXCR2</i>   | <i>HGF</i>      | <i>ILDR1</i>    |
| <i>KARS</i>                            | <i>LHFPL5</i>  | <i>LOXHD1</i>   | <i>LRTOMT</i>   | <i>MARVELD2</i> |
| <i>MET</i>                             | <i>MSRB3</i>   | <i>MYO15A</i>   | <i>MYO3A</i>    | <i>MYO6</i>     |
| <i>MYO7A 5</i>                         | <i>NARS2 6</i> | <i>OTOG</i>     | <i>OTOGL</i>    | <i>OTOA</i>     |
| <i>OTOF</i>                            | <i>PCDH15</i>  | <i>PNPT1</i>    | <i>PTPRQ</i>    | <i>RDX</i>      |
| <i>RIPOR2</i>                          | <i>ROR1 7</i>  | <i>SIPR2</i>    | <i>SERPINB6</i> | <i>SLC22A4</i>  |
| <i>SLC26A4</i>                         | <i>SLC26A5</i> | <i>STRC</i>     | <i>SYNE4</i>    | <i>TECTA</i>    |
| <i>TBC1D24</i>                         | <i>TMC1</i>    | <i>TMEM132E</i> | <i>TMIE</i>     | <i>TMPRSS3</i>  |
| <i>TPRN</i>                            | <i>TRIOBP</i>  | <i>TSPEAR</i>   | <i>USH1C 12</i> | <i>WBP2</i>     |
| <i>WHRN</i>                            |                |                 |                 |                 |
| <b>X-linked Inheritance</b>            |                |                 |                 |                 |
| <i>PRPS1</i>                           | <i>POU3F4</i>  | <i>SMPX</i>     | <i>AIFM1</i>    | <i>COL4A6</i>   |

**Table S4: Computational predictions, variant annotation and classification.**

| <b>HGNC Symbol</b> | <b>Position (hg19)</b> | <b>Amino Acid/<br/>Nucleotide<br/>Change</b> | <b>CADD</b> | <b>GERP</b> | <b>Population<br/>Frequency<br/>(gnomAD)</b> | <b>ACMG<br/>Classification</b> |
|--------------------|------------------------|----------------------------------------------|-------------|-------------|----------------------------------------------|--------------------------------|
| <b>GFI1</b>        | Chr1:92,941,710        | p.Asn382Ser/<br>c.1145A>G<br>NM_005263.5     | 23.9        | 4.18        | 0                                            | Pathogenic                     |
| <b>MYO6</b>        | Chr6:76,623,866        | p.Ile1176Leu/<br>c.3526A>C<br>NM_004999.4    | 25.3        | 5.89        | 3/277220                                     | Likely<br>pathogenic           |

**Supplemental References:**

Shearer, A.E., Hildebrand, M.S., Smith, R.J.H. Hereditary Hearing Loss and Deafness Overview. Adam MP, Ardinger HH, Pagon RA, et al., editors. GeneReviews® [Internet]. Seattle (WA): University of Washington, Seattle; 1993-2019. Available from: <https://www.ncbi.nlm.nih.gov/books/NBK1434/>

Skokowa, J., Dale, D. C., Touw, I. P., Zeidler, C. & Welte, K. (2017). Severe congenital neutropenias. *Nature Reviews Disease Primers* **3**: 17032.
