# Supplementary material for: Two monogenic disorders masquerading as one: severe congenital neutropenia with monocytosis and non-syndromic sensorineural hearing loss
Source: PubMed Central journal article supplement (PMC7026993; doi:10.1186/s12881-020-0971-z), 2020-02-17
Supplement: 12881_2020_971_MOESM2_ESM.pdf [file 12881_2020_971_MOESM2_ESM.pdf]

|    |                |      |                                                      |      |
|----|----------------|------|------------------------------------------------------|------|
| A. | H. sapiens     | 340  | YPCQYCGKRFHQKSDMKKHTFIHTGEKPHKCQVCGKAFSQSSNLI THSRK  | 389  |
|    | P. troglodytes | 162  | YPCQYCGKRFHQKSDMKKHTFIHTGEKPHKCQVCGKAFSQSSNLI THSRK  | 211  |
|    | M. mulatta     | 340  | YPCQYCGKRFHQKSDMKKHTFIHTGEKPHKCQVCGKAFSQSSNLI THSRK  | 389  |
|    | C. lupus       | 340  | YPCQYCGKRFHQKSDMKKHTFIHTGEKPHKCQVCGKAFSQSSNLI THSRK  | 389  |
|    | B. taurus      | 338  | YPCQYCGKRFHQKSDMKKHTFIHTGEKPHKCQVCGKAFSQSSNLI THSRK  | 387  |
|    | M. musculus    | 341  | YPCQYCGKRFHQKSDMKKHTFIHTGEKPHKCQVCGKAFSQSSNLI THSRK  | 390  |
|    | R. norvegicus  | 341  | YPCQYCGKRFHQKSDMKKHTFIHTGEKPHKCQVCGKAFSQSSNLI THSRK  | 390  |
|    | G. gallus      | 315  | YPCQYCGKRFHQKSDMKKHTFIHTGEKPHKCQVCGKAFSQSSNLI THSRK  | 364  |
|    | D. Rerio       | 314  | YPCQYCGKRFHQKSDMKKHTFIHTGEKPHKCQVCGKAFSQSSNLI THSRK  | 363  |
|    | X. tropicalis  | 301  | YPCQYCGKRFHQKSDMKKHTFIHTGEKPHKCQVCGKAFSQSSNLI THSRK  | 350  |
| B. | H. sapiens     | 1135 | TDYDFAPFLNNSPQQNPAAQIPARQQE IEMNRQQRFFRI PFIRPADQYKD | 1184 |
|    | P. troglodytes | 1135 | TDYDFAPFLNNSPQQNPAAQIPARQQE IEMNRQQRFFRI PFIRPADQYKD | 1184 |
|    | M. mulatta     | 1112 | TDY-----AQQNPAAQIPARQQE I EVNRQQRFFRI PFIRPADQYKD    | 1152 |
|    | C. lupus       | 1131 | TDYDFAPFLNNSPQQNPASQLPARQQE MEMNRQQRFFRI PFIRPADQYKD | 1180 |
|    | B. taurus      | 1136 | TDYDFAPFLNNSPQQNPAAQLPARQQE IEMNRQQRFFRI PFIRPADQYKD | 1185 |
|    | M. musculus    | 1112 | TDYDFAPFLNNSPQQNPAAQLPARQQE IDMKRQQRFFRI PFIRPADQYKD | 1161 |
|    | R. norvegicus  | 1106 | TDYDFAPFLNNSPQQNPAAQLPARQQE IEMNRQQRFFRI PFIRPADQYKD | 1155 |
|    | G. gallus      | 1135 | TDY-----AQQNPTAQLPMRQQE IE INRQQRYFRI PFIRPMDQYKD    | 1175 |
|    | D. rerio       | 1126 | TDY-----AQQNPAPPVPARQQE IAMNRQQRYFRI PFIRPADQYKD     | 1166 |
|    | X. tropicalis  | 1137 | TDYDFAPFMNNSPQQNPVVQLPARQQE IEMNRQQRYFRI PFIRPADQYKD | 1186 |

**Fig S1: Sequence conservation of mutated residues in *GFI1* and *MYO*, across species.** Mutations found in the family in *GFI1* (p.N382S/c.1145A>G) (A) and *MYO6* (p.I1176L/c.3526A>C) (B) are in residues that are highly conserved across species.
